# Supplementary material for: Geometric Structure, Electronic, and Spectral Properties of Metal-free Phthalocyanine under the External Electric Fields
Source: PubMed Central journal article supplement — ACS Omega. 2022 Nov 1;7(45):41266–74. doi: 10.1021/acsomega.2c04941 (PMC9670904; doi:10.1021/acsomega.2c04941), 2022-11-01
Supplement: ao2c04941_si_001.pdf [file ao2c04941_si_001.pdf]

# Supporting Information for Geometric structure, electronic and spectral properties of metal-free phthalocyanine under the external electric fields

Yue-Ju Yang, Shi-Xiong Li,\* De-Liang Chen, Zheng-Wen Long

**Yue-Ju Yang** — School of Physics and Electronic Science, Guizhou Education University, Guiyang 550018, China

**Shi-Xiong Li** — School of Physics and Electronic Science, Guizhou Education University, Guiyang 550018, China

**De-Liang Chen** — School of Physics and Electronic Science, Guizhou Education University, Guiyang 550018, China

**Zheng-Wen Long** — College of physics, Guizhou University, Guiyang 550025, China

\*email: [leesxoptics@163.com](mailto:leesxoptics@163.com)

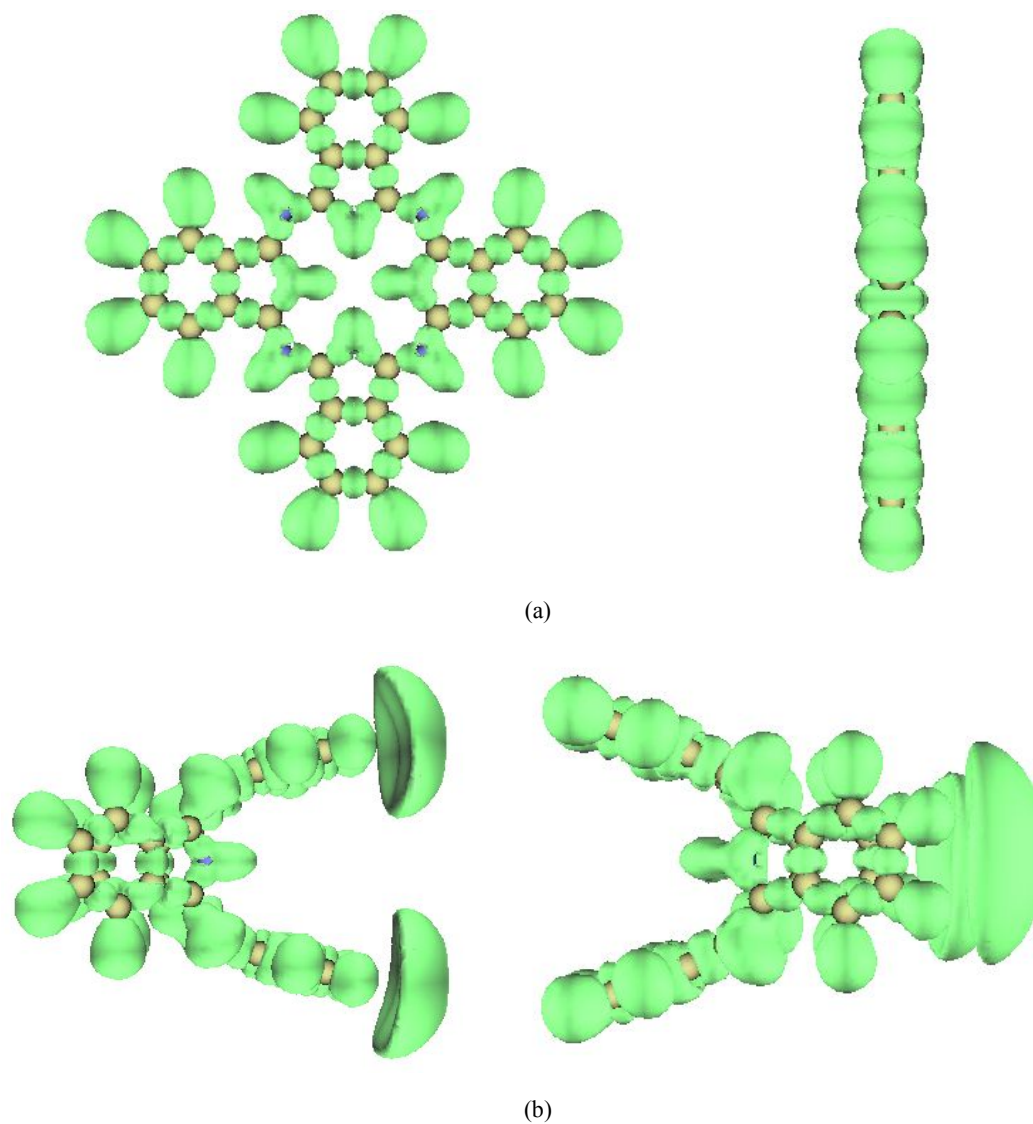

**Figure S1.** Electron localization function (ELF) with the isovalue set to 0.70. (a) EEF is 0 a.u., the left is observed along the x direction and the right is observed along the z direction, and (b) EEF is -0.025 a.u., the left is observed along the y direction and the right is observed along the z direction.

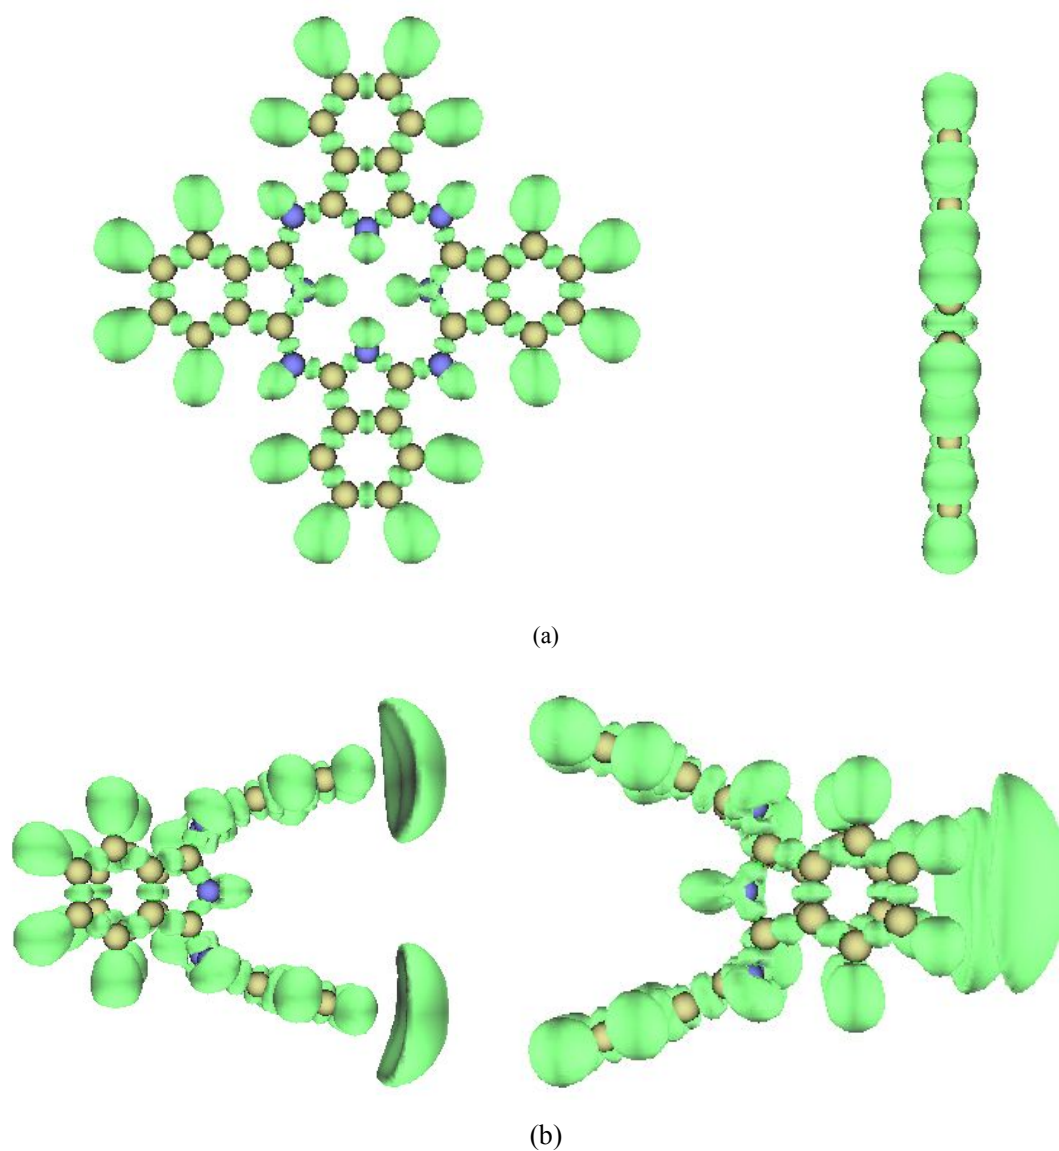

**Figure S2.** Electron localization function (ELF) with the isovalue set to 0.80. (a) EEF is 0 a.u., the left is observed along the x direction and the right is observed along the z direction, and (b) EEF is -0.025 a.u., the left is observed along the y direction and the right is observed along the z direction.

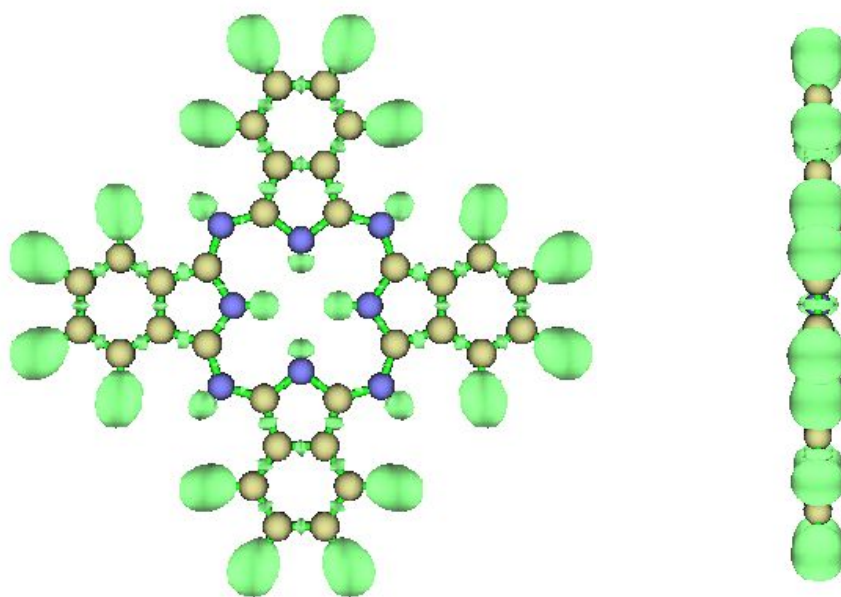

(a)

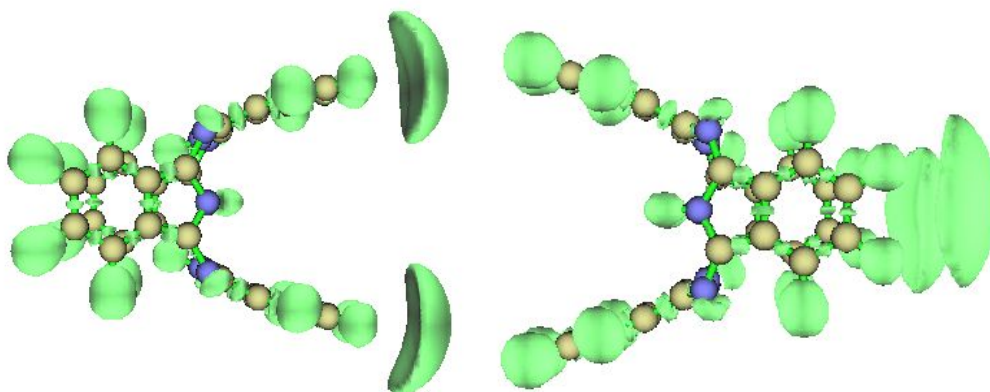

(b)

**Figure S3.** Electron localization function (ELF) with the isovalue set to 0.90. (a) EEF is 0 a.u., the left is observed along the x direction and the right is observed along the z direction, and (b) EEF is -0.025 a.u., the left is observed along the y direction and the right is observed along the z direction.

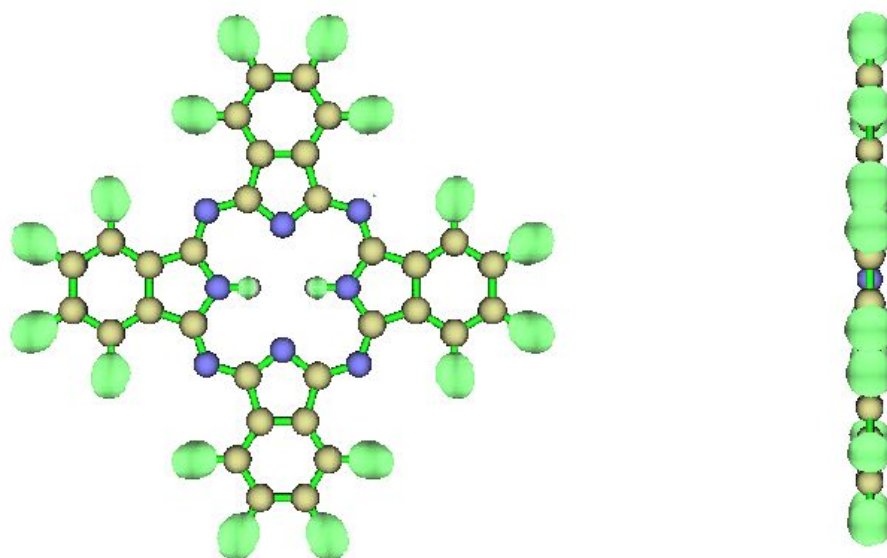

(a)

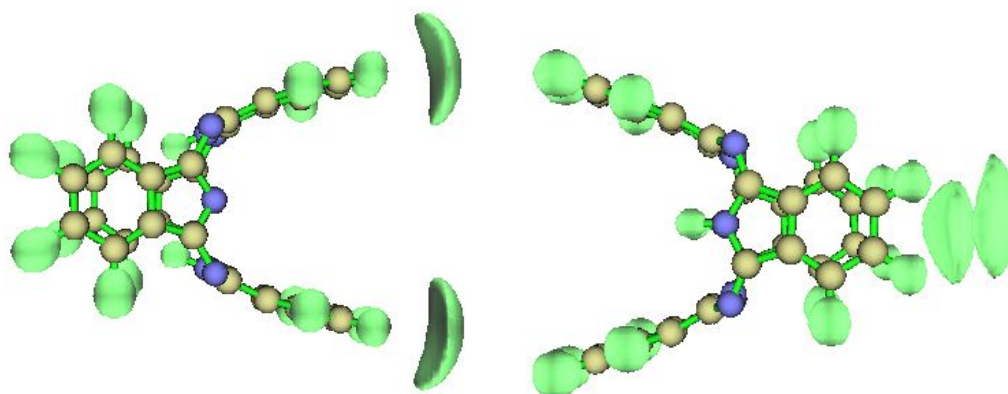

(b)

**Figure S4.** Electron localization function (ELF) with the isovalue set to 0.96. (a) EEF is 0 a.u., the left is observed along the x direction and the right is observed along the z direction, and (b) EEF is -0.025 a.u., the left is observed along the y direction and the right is observed along the z direction.
